# Supplementary material for: Early Childhood Education and Midlife Ideal Cardiovascular Health in a Prospective Urban Cohort
Source: PubMed Central journal article supplement (PMC10580152; doi:10.1001/jamapediatrics.2023.4010), 2023-10-16
Supplement: jamapediatr-e234010-s002.pdf [file jamapediatr-e234010-s002.pdf]

## Data Sharing Statement

Reynolds. Early Childhood Education and Midlife Ideal Cardiovascular Health in a Prospective Urban Cohort. *JAMA Pediatr.* Published October 16, 2023.

doi:10.1001/jamapediatrics.2023.4010

### Data

**Data available:** Yes

**Data types:** Data dictionary

**How to access data:** hcrc.umn.edu

**When available:** With publication

### Supporting Documents

**Document types:** None

### Additional Information

**Who can access the data:** approved data request

**Types of analyses:** approved by request

**Mechanisms of data availability:** submission to team
